# Supplementary material for: Effect of Dalbavancin on Staphylococcal Biofilms When Administered Alone or in Combination With Biofilm-Detaching Compounds
Source: PubMed Central journal article supplement (PMC7180179; doi:10.3389/fmicb.2020.00553), 2020-04-17
Supplement: Data_Sheet_1.pdf [file Data_Sheet_1.pdf]

**Supplementary Table 1.** Characteristics of the bacterial strains used in this study.

| <b>Strain</b> | <b>Species</b>        | <b>Relevant properties</b>                        | <b>Source or reference</b>   |
|---------------|-----------------------|---------------------------------------------------|------------------------------|
| <b>43040</b>  | <i>S. epidermidis</i> | Clinical isolate from catheter related bacteremia | Ferrer et al., 2016          |
| <b>240</b>    | <i>S. aureus</i>      | Reference strain for antibiotic test              | Human lesion isolated by FDA |
| <b>MRSA1</b>  | <i>S. aureus</i>      | Clinical isolate from catheter related bacteremia | This study                   |
| <b>MRSA2</b>  | <i>S. aureus</i>      | Clinical isolate from catheter related bacteremia | This study                   |
| <b>MRSA3</b>  | <i>S. aureus</i>      | Clinical isolate from catheter related bacteremia | This study                   |
| <b>MRSA4</b>  | <i>S. aureus</i>      | Clinical isolate from catheter related bacteremia | This study                   |
| <b>MRSA5</b>  | <i>S. aureus</i>      | Clinical isolate from catheter related bacteremia | This study                   |

**Supplementary Table 2.** Minimum inhibitory concentration (MIC) values of vancomycin, linezolid, cloxacillin and rifampicin measured by the standard E-test protocols and expressed as mg/L. S and R in the table indicate if the strain was considered susceptible or resistant according to EUCAST guidelines.

|                | <b>VANCOMYCIN</b> | <b>LINEZOLID</b> | <b>CLOXACILLIN</b> | <b>RIFAMPICIN</b> |
|----------------|-------------------|------------------|--------------------|-------------------|
| <b>SA240</b>   | 0.75 S            | 0.75 S           | 0.25 S             | 0.5 S             |
| <b>MRSA4</b>   | 1 S               | 0.5 S            | >2 R               | 0.006 S           |
| <b>SE43030</b> | 2S                | 0.19 S           | >32 R              | 0.5 S             |

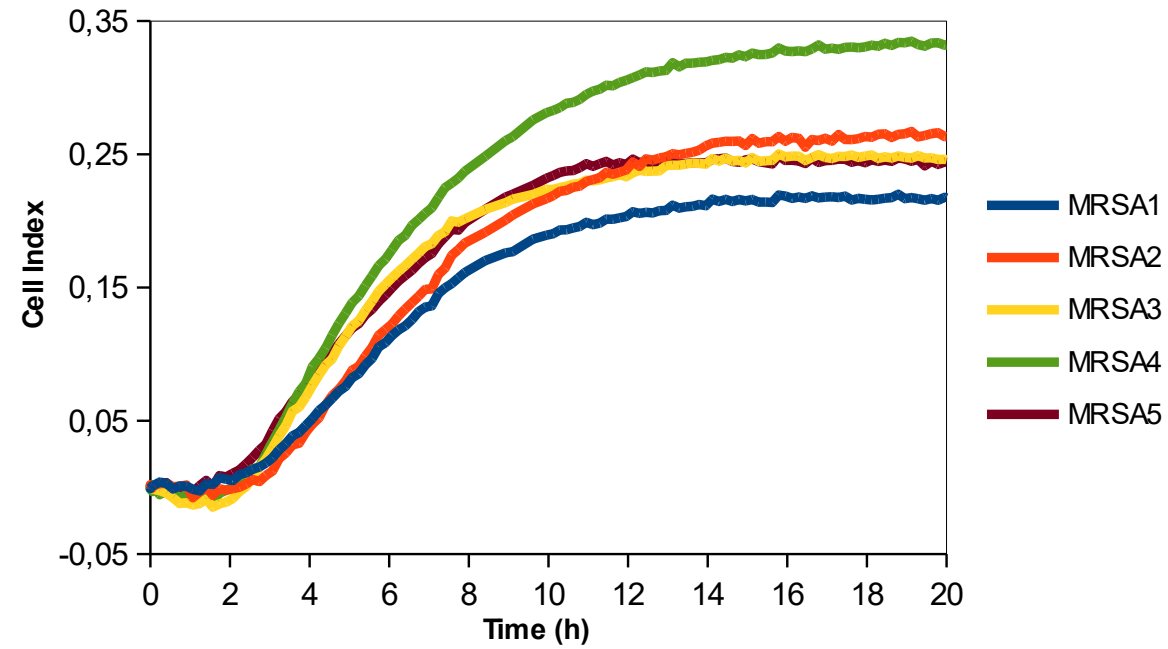

**Supplementary Figure 1.** Biofilm growth dynamics of methicillin resistant *S. aureus* strains (MRSA). Bacteria were grown on TSB supplemented with 0.25% glucose at 37°C. The Cell Index values are measured by impedance in an xCELLigence equipment and correlate with total biofilm mass. Data are the means of two replicates per strain.

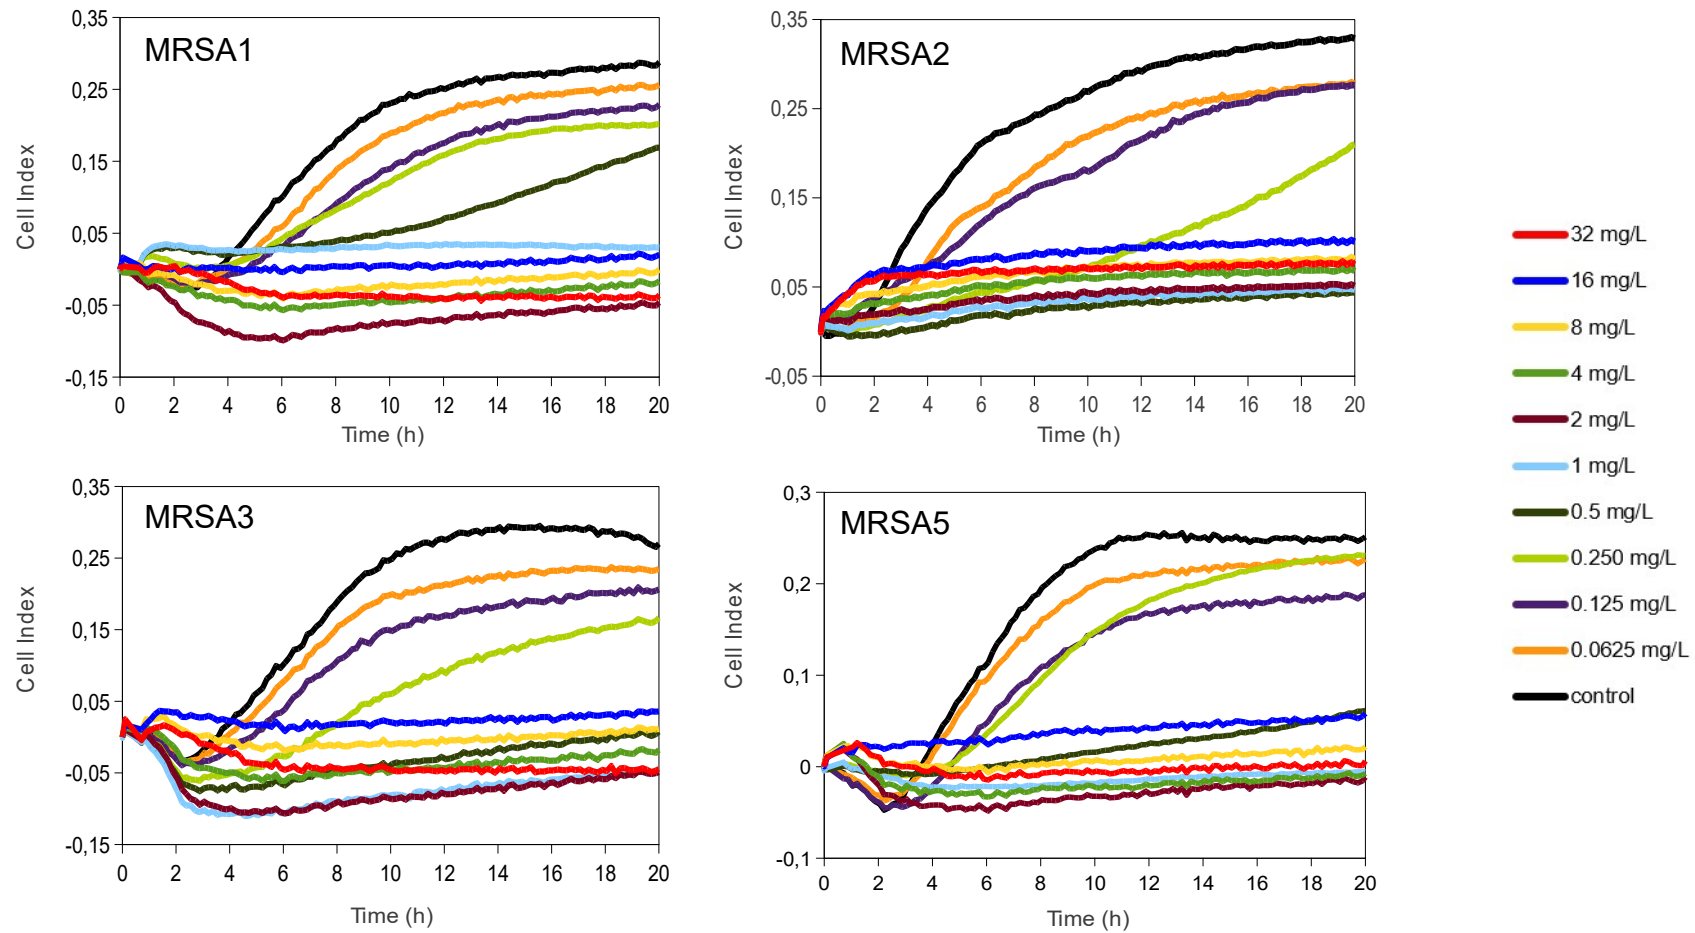

**Supplementary Figure 2.** Dalbavancin effect on bacterial biofilms in methicillin resistant *S. aureus* MRSA1, MRSA2, MRSA3 and MRSA5 strains. Dalbavancin was added from the beginning of the experiment at the concentrations indicated in the legend. Bacteria were grown on TSB supplemented with 0.25% glucose at 37°C. Data are the means of two replicates per strain.

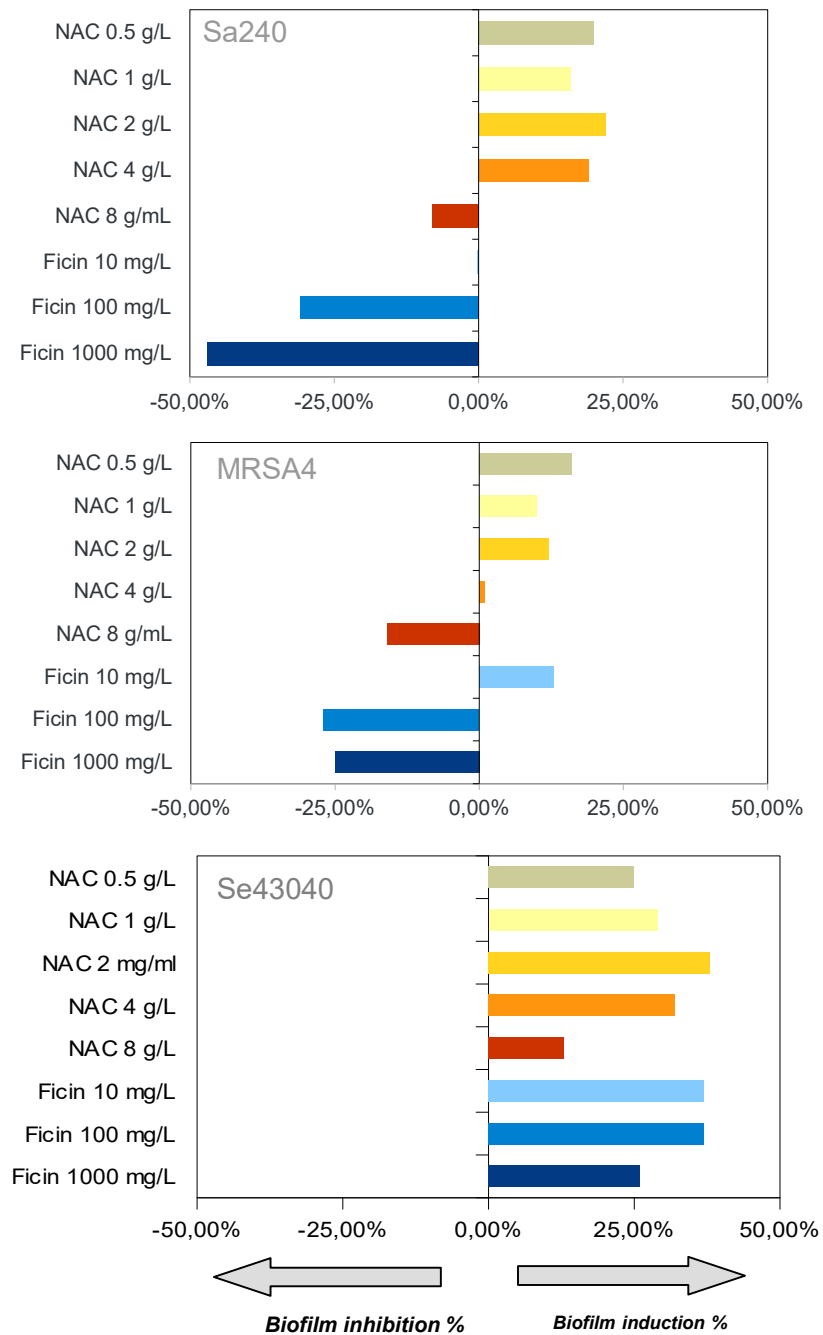

**Supplementary Figure 3.** Effect of anti-biofilm compounds NAC and ficin on biofilm growth of *S. aureus* strains Sa240 (A) and MRSA4 (B) and *S. epidermidis* 43040 (C) after 20h of biofilm growth. Biofilm detaching molecules were added at the beginning of the experiment at the concentrations indicated in the Y axis. Each bar represents the percentage of biofilm inhibition/induction compared to an untreated control. Biofilm growth was determined by impedance values in an xCELLigence equipment. All obtained values were statistically significant (n=5 per treatment, t-test,  $p < 0.05$ ).
